# Supplementary material for: Frailty Index based on laboratory tests and in-hospital falls among older adults
Source: Research Square preprint supplement (doi:10.21203/rs.3.rs-6290898/v1), 2025-05-06

## Supplementary Information

### Article title

Frailty Index based on laboratory tests and in-hospital falls among older adults

### Journal name

Aging Clinical and Experimental Research

### Authors

Hiroataka Nakashima, Takahiro Imaizumi, Hitoshi Komiya, Akemi Morohashi, Kazuhisa Watanabe, Chisato Fujisawa, Yosuke Yamada, Yoshimasa Nagao, Hiroyuki Umegaki

### \*Corresponding author

Hiroataka Nakashima

Department of Geriatrics, Nagoya University Hospital, Nagoya, Japan

Email: nakashima.hiroataka.d5@f.mail.nagoya-u.ac.jp

**Supplementary Table 1.** Original version of STRATIFY and the modified versions used in the present study.

**Supplementary Table 2.** Laboratory data used to construct the Frailty Index-laboratory (FI-lab).

**Supplementary Table 3.** Items included in the standard non-laboratory Frailty Index (FI-clinical).

**Supplementary Table 4.** Fall risk assessment tool used at the authors' hospital.

**Supplementary Table 5.** Common primary reasons for admission.

**Supplementary Table 6.** Baseline characteristics of the study population and outcomes according to FI-lab score (n=5984).

**Supplementary Table 7.** Results of subgroup analyses.

**Supplementary Table 8.** Results of sensitivity analyses.

**Supplementary Figure 1.** Frequency distributions for the STRATIFY (A), standard non-laboratory Frailty Index (FI-clinical) (B), and Frailty Index-laboratory (FI-lab) (C) (n=5984).

## Supplementary Table 1

Original version of STRATIFY and the modified versions used in the present study.

|   | Item                  | Original STRATIFY*                                                                                                     | Modified STRATIFY                                                          |
|---|-----------------------|------------------------------------------------------------------------------------------------------------------------|----------------------------------------------------------------------------|
| 1 | History of falls      | Did the patient present to hospital with a fall or has he or she fallen on the ward since admission? (Yes = 1, No = 0) | History of falls within 1 year.‡<br>(Yes = 1, No = 0)                      |
| 2 | Mental status         | Agitated?†<br>(Yes = 1, No = 0)                                                                                        | Is the patient confused, disoriented, or agitated?†.§<br>(Yes = 1, No = 0) |
| 3 | Vision                | Visually impairment to the extent that everyday function is affected?†<br>(Yes = 1, No = 0)                            | (Same as the original)                                                     |
| 4 | Toileting             | In need of especially frequent toileting?†<br>(Yes = 1, No = 0)                                                        | (Same as the original)                                                     |
| 5 | Transfer and mobility | Transfer and mobility score of 3 or 4?†<br>(Yes = 1, No = 0)                                                           | (Same as the original)                                                     |

Notes: STRATIFY = St. Thomas's Risk Assessment Tool in Falling Elderly Inpatients

\*Based on Oliver et al. BMJ 1997; 315: 1049.

†Judged by nurses. No attempt was made to standardize the formation of these judgments.

‡Based on history-taking.

§Referring to Papaioannou et al. BMC Medicine 2004; 2: 1.

## Supplementary Table 2

Laboratory data used to construct the Frailty Index-laboratory (FI-lab).

| Variable*         | Unit                 | Total population |                 | Male          |                 | Female        |                 |
|-------------------|----------------------|------------------|-----------------|---------------|-----------------|---------------|-----------------|
|                   |                      | 0<br>(Normal)    | 1<br>(Abnormal) | 0<br>(Normal) | 1<br>(Abnormal) | 0<br>(Normal) | 1<br>(Abnormal) |
| WBC               | ×10 <sup>3</sup> /μL | 3.3-8.6          | <3.3 or >8.6    |               |                 |               |                 |
| Neutrophil        | ×10 <sup>3</sup> /μL | 1.0-7.5          | <1.0 or >7.5    |               |                 |               |                 |
| Lymphocyte        | ×10 <sup>3</sup> /μL | 1.0-4.0          | <1.0 or >4.0    |               |                 |               |                 |
| Hemoglobin        | g/dL                 |                  |                 | 13.7-16.8     | <13.7 or >16.8  | 11.6-14.8     | <11.6 or >14.8  |
| Hematocrit        | %                    |                  |                 | 40.7-50.1     | <40.7 or >50.1  | 35.1-44.4     | <35.1 or >44.4  |
| MCV               | fL                   | 83.6-98.2        | 83.6< or >98.2  |               |                 |               |                 |
| RDW               | %                    | 11-14            | <11 or >14      |               |                 |               |                 |
| Platelet count    | ×10 <sup>3</sup> /μL | 158-348          | <158 or >348    |               |                 |               |                 |
| Total protein     | g/dL                 | 6.6-8.1          | <6.6 or >8.1    |               |                 |               |                 |
| Albumin           | g/dL                 | 4.1-5.1          | <4.1 or >5.1    |               |                 |               |                 |
| Glucose           | mg/dL                | 73-109           | <73 or >109     |               |                 |               |                 |
| Urea              | mg/dL                | 8-20             | <8 or >20       |               |                 |               |                 |
| Creatinine        | mg/dL                |                  |                 | 0.65-1.07     | <0.65 or >1.07  | 0.46-0.79     | <0.46 or >0.79  |
| Uric acid         | mg/dL                |                  |                 | 3.7-7.8       | <3.7 or >7.8    | 2.6-5.5       | <2.6 or >5.5    |
| Sodium            | mmol/L               | 138-145          | <138 or >145    |               |                 |               |                 |
| Potassium         | mmol/L               | 3.6-4.8          | <3.6 or >4.8    |               |                 |               |                 |
| Chloride          | mmol/L               | 101-108          | <101 or >108    |               |                 |               |                 |
| Corrected calcium | mg/dL                | 8.8-10.1         | <8.8 or >10.1   |               |                 |               |                 |
| AST               | U/L                  | 13-30            | <13 or >30      |               |                 |               |                 |
| ALT               | U/L                  |                  |                 | 10-42         | <10 or >42      | 7-23          | <7 or >23       |
| LDH               | U/L                  | 124-222          | <124 or >222    |               |                 |               |                 |
| Total bilirubin   | mg/dL                | 0.4-1.5          | <0.4 or >1.5    |               |                 |               |                 |
| ALP (JSCC)        | U/L                  | 106-322          | <106 or >322    |               |                 |               |                 |
| γGTP              | U/L                  |                  |                 | 13-64         | <13 or >64      | 9-32          | <9 or >32       |
| Amylase           | U/L                  | 44-132           | <44 or >132     |               |                 |               |                 |
| CK                | U/L                  |                  |                 | 59-248        | <59 or >248     | 41-153        | <41 or >153     |
| Total cholesterol | mg/dL                | 142-248          | <142 or >248    |               |                 |               |                 |
| Triglyceride      | mg/dL                |                  |                 | 40-234        | <40 or >234     | 30-117        | <30 or >117     |
| HDL-C             | mg/dL                |                  |                 | 38-90         | <38 or >90      | 48-103        | <48 or >103     |
| LDL-C             | mg/dL                | 65-163           | <65 or >163     |               |                 |               |                 |
| HbA1c             | %                    | 4.9-6.0          | <4.9 or >6.0    |               |                 |               |                 |
| CRP               | mg/dL                | ≤0.14            | >0.14           |               |                 |               |                 |
| PT                | %                    | 80-120           | <80 or >120     |               |                 |               |                 |
| APTT              | %                    | 80-120           | <80 or >120     |               |                 |               |                 |
| Fibrinogen        | mg/dL                | 200-400          | <200 or >400    |               |                 |               |                 |

Notes: ALT = alanine transaminase; ALP = alkaline phosphatase; APTT = activated partial thromboplastin time; AST = aspartate transaminase; CK = creatine kinase; CRP = C-reactive protein; γGTP = gamma-glutamyl transpeptidase; HbA1c = hemoglobin A1c; HDL-C = high-density lipoprotein cholesterol; JSCC = Japan Society of Clinical Chemistry; LDH = lactate dehydrogenase; LDL-C = low-density lipoprotein-cholesterol; MCV = mean cell volume; PT = prothrombin time; RDW = red cell distribution width; WBC = white blood cells

\*Cut-off values were obtained from our Department of Laboratory Medicine.

### Supplementary Table 3

Items included in the standard non-laboratory Frailty Index (FI-clinical).

| Variable                        | Deficit value                  |                 |                        |                  |                                     |
|---------------------------------|--------------------------------|-----------------|------------------------|------------------|-------------------------------------|
|                                 | 0 points                       | 0.33 points     | 0.5 points             | 0.66 points      | 1 point                             |
| 1 History of falls              | absent                         |                 |                        |                  | present                             |
| 2 Muscle weakness               | absent                         |                 |                        |                  | present                             |
| 3 Difficulty with balance       | absent                         |                 |                        |                  | present                             |
| 5 Shuffling or festinating gait | absent                         |                 |                        |                  | present                             |
| 4 Contracture                   | absent                         |                 |                        |                  | present                             |
| 6 Frequent urination            | absent                         |                 |                        |                  | present                             |
| 7 Nocturia                      | absent                         |                 |                        |                  | present                             |
| 8 BMI                           | 21.5-25.0<br>kg/m <sup>2</sup> |                 |                        |                  | <21.5 or >25.0<br>kg/m <sup>2</sup> |
| 9 Coronary artery disease       | absent                         |                 |                        |                  | present                             |
| 10 Congestive heart failure     | absent                         |                 |                        |                  | present                             |
| 11 Peripheral artery disease    | absent                         |                 |                        |                  | present                             |
| 12 Dementia                     | absent                         |                 |                        |                  | present                             |
| 13 COPD                         | absent                         |                 |                        |                  | present                             |
| 14 Peptic ulcer disease         | absent                         |                 |                        |                  | present                             |
| 15 Chronic kidney disease       | absent                         |                 |                        |                  | present                             |
| 16 Cerebral vascular accident   | absent                         |                 |                        |                  | present                             |
| 17 Diabetes mellitus            | absent                         |                 |                        |                  | present                             |
| 18 Hypertension                 | absent                         |                 |                        |                  | present                             |
| 19 Use of sleep medication(s)   | no                             |                 |                        |                  | yes                                 |
| 20 Feeding                      | independent                    |                 | needs help             |                  | totally dependent                   |
| 21 Position change in bed       | independent                    |                 | needs help             |                  | totally dependent                   |
| 22 Maintaining sitting position | independent                    |                 |                        |                  | totally dependent                   |
| 23 Sitting adjustment           | independent                    |                 |                        |                  | totally dependent                   |
| 24 Transfer                     | independent                    | minor help      |                        | major help       | totally dependent                   |
| 25 Walking                      | independent                    | walks with help |                        | wheelchair bound | Immobile                            |
| 26 Use of walking aids          | no                             |                 |                        |                  | yes                                 |
| 27 Stairs                       | independent                    |                 | needs help             |                  | total dependent                     |
| 28 Grooming                     | independent                    |                 |                        |                  | needs help with<br>personal care    |
| 29 Bathing                      | independent                    |                 |                        |                  | total dependent                     |
| 30 Dressing                     | independent                    |                 | needs help             |                  | total dependent                     |
| 31 Toilet                       | independent                    |                 | needs help             |                  | totally dependent                   |
| 32 Bowel control                | continent                      |                 | occasional<br>accident |                  | incontinent                         |
| 33 Use of diaper for defecation | no                             |                 |                        |                  | yes                                 |
| 34 Bladder control              | continent                      |                 | occasional<br>accident |                  | incontinent                         |
| 35 Use of diaper for urination  | no                             |                 |                        |                  | yes                                 |
| 36 Disorientation               | absent                         |                 |                        |                  | present                             |
| 37 Impaired comprehension       | absent                         |                 |                        |                  | present                             |
| 38 Impaired memory              | absent                         |                 |                        |                  | present                             |
| 39 Swallowing difficulty        | absent                         |                 |                        |                  | present                             |
| 40 Hearing problems             | no problems                    |                 |                        |                  | hear only<br>loud voices            |

## Supplementary Table 4

Fall risk assessment tool used at the authors' hospital.

| Major category                            | Items                                                                                                                                                                                                                                                                               |
|-------------------------------------------|-------------------------------------------------------------------------------------------------------------------------------------------------------------------------------------------------------------------------------------------------------------------------------------|
| 1. History of falls                       | <ol style="list-style-type: none"><li>1. History of falls</li><li>2. History of syncope</li><li>3. History of convulsions</li><li>4. History of epilepsy</li></ol>                                                                                                                  |
| 2. Disorder of the sensory system         | <ol style="list-style-type: none"><li>1. Visual impairment</li><li>2. Hearing impairment</li></ol>                                                                                                                                                                                  |
| 3. Disorder of the musculoskeletal system | <ol style="list-style-type: none"><li>1. Muscle weakness</li><li>2. Paralysis, numbness</li><li>3. Dizziness</li><li>4. Lightheadedness</li><li>5. Joint abnormalities/contractures/deformations</li><li>6. Gait disturbance</li></ol>                                              |
| 4. Disorder of cognition function         | <ol style="list-style-type: none"><li>1. Disturbance of consciousness</li><li>2. Restlessness</li><li>3. Disorientation</li><li>4. Memory disturbance</li><li>5. Impaired judgment</li><li>6. Not able to press a buzzer</li></ol>                                                  |
| 5. Dysfunction of urination/defecation    | <ol style="list-style-type: none"><li>1. Needs helper</li><li>2. Fecal incontinence</li><li>3. Frequent urination</li><li>4. Go to bathroom often at night</li><li>5. Needs diapers for defecation</li><li>6. Urinary incontinence</li><li>7. Needs diapers for urination</li></ol> |
| 6. Mobility dysfunction/dependency        | <ol style="list-style-type: none"><li>1. Inability to stand or walk</li><li>2. Cane</li><li>3. Walker</li><li>4. Wheelchair</li><li>5. Need assistance</li><li>6. Use of intravenous infusion, placement of drains, oxygenation</li></ol>                                           |
| 7. Medication                             | <ol style="list-style-type: none"><li>1. Hypnotics (occasionally)</li><li>2. Hypnotics (every day)</li><li>3. Psychotropic drugs</li><li>4. Anticancer agents</li><li>5. Opioids</li><li>6. Analgesics</li><li>7. Antihypertensive agents</li></ol>                                 |

## Supplementary Table 5

Common primary reasons for admission.

| Rank | Major diagnostic category               | n    | %*   |
|------|-----------------------------------------|------|------|
| 1    | Cancer and complications                | 2650 | 44.3 |
| 2    | Arrhythmia                              | 263  | 4.4  |
| 3    | Heart failure                           | 212  | 3.5  |
| 4    | Arterial diseases                       | 189  | 3.2  |
| 5    | Neurological diseases other than stroke | 175  | 2.9  |
| 6    | Benign gastrointestinal tumor           | 156  | 2.6  |
| 7    | Renal failure                           | 130  | 2.2  |
| 8    | Biliary diseases                        | 130  | 2.9  |
| 9    | Cardiac valvular diseases               | 110  | 1.8  |
| 10   | Diabetes mellitus and complications     | 99   | 1.7  |
| 11   | Acute coronary syndrome                 | 82   | 1.4  |
| 12   | Pneumonia                               | 65   | 1.1  |
| 13   | Gastrointestinal ileus                  | 60   | 1.0  |
| 14   | Gastrointestinal bleeding               | 57   | 1.0  |
| 15   | Autoimmune disorders                    | 45   | 0.8  |

\*Percentage of cases to total admissions (n=5984).

## Supplementary Table 6

Baseline characteristics of the study population and outcomes according to FI-lab score (n=5984).

|                                                      | Total         | Low (<0.25)   | Moderate (0.25–0.4) | High (>0.4)  | p <sup>g</sup>     |
|------------------------------------------------------|---------------|---------------|---------------------|--------------|--------------------|
| Participants, n (%)                                  | 5984 (100.0)  | 2383 (39.8)   | 1859 (31.1)         | 1742 (29.1)  |                    |
| Age, years                                           | 73.0 ± 7.3    | 71.5 ± 6.7    | 73.7 ± 7.3          | 74.4 ± 7.7   | <.001 <sup>h</sup> |
| Male sex                                             | 3798 (63.5)   | 1383 (58.0)   | 1253 (67.4)         | 1162 (66.7)  | <.001 <sup>i</sup> |
| Emergency hospitalization                            | 1551 (25.9)   | 236 (9.9)     | 395 (21.2)          | 920 (52.8)   | <.001 <sup>i</sup> |
| Body mass index, kg/m <sup>2</sup>                   | 22.3 ± 3.8    | 22.8 ± 3.5    | 22.3 ± 3.9          | 21.8 ± 4.0   | <.001 <sup>h</sup> |
| Barthel Index <sup>a</sup> , median (IQR)            | 100 (100–100) | 100 (100–100) | 100 (100–100)       | 100 (80–100) | <.001 <sup>h</sup> |
| Barthel Index <sup>a</sup> , mean ± SD <sup>b</sup>  | 94.1 ± 15.5   | 98.0 ± 8.2    | 95.4 ± 13.3         | 87.4 ± 21.7  |                    |
| CCI <sup>c</sup>                                     | 2 (1–2)       | 2 (0–2)       | 2 (1–2)             | 2 (1–3)      | <.001 <sup>h</sup> |
| Polypharmacy score <sup>d</sup>                      | 1 (0–2)       | 1 (0–2)       | 1 (0–2)             | 1 (1–2)      | <.001 <sup>h</sup> |
| STRATIFY score <sup>e</sup> , median (IQR)           | 0 (0–1)       | 0 (0–0)       | 0 (0–1)             | 0 (0–1)      | <.001 <sup>h</sup> |
| STRATIFY score <sup>e</sup> , mean ± SD <sup>b</sup> | 0.42 ± 0.72   | 0.30 ± 0.56   | 0.39 ± 0.70         | 0.62 ± 0.89  |                    |
| History of falls                                     | 807 (13.5)    | 201 (8.4)     | 255 (13.7)          | 351 (20.1)   | <.001 <sup>i</sup> |
| Mental state abnormality                             | 353 (5.9)     | 76 (3.2)      | 94 (5.1)            | 183 (10.5)   | <.001 <sup>i</sup> |
| Vision impairment                                    | 442 (7.4)     | 188 (7.9)     | 117 (6.3)           | 137 (7.9)    | .83 <sup>i</sup>   |
| Frequent urination                                   | 419 (7.0)     | 161 (6.8)     | 133 (7.2)           | 125 (7.2)    | .59 <sup>i</sup>   |
| Transferring and/or mobility impairment              | 504 (8.4)     | 80 (3.4)      | 133 (7.2)           | 291 (16.7)   | <.001 <sup>i</sup> |
| FI-lab <sup>f</sup>                                  | 0.31 ± 0.16   | 0.15 ± 0.06   | 0.32 ± 0.04         | 0.51 ± 0.09  | <.001 <sup>h</sup> |
| Measured ratio                                       | 0.87 ± 0.08   | 0.88 ± 0.07   | 0.87 ± 0.08         | 0.87 ± 0.08  | .027 <sup>h</sup>  |
| FI-clinical <sup>f</sup>                             | 0.11 ± 0.09   | 0.08 ± 0.06   | 0.11 ± 0.08         | 0.16 ± 0.12  | <.001 <sup>h</sup> |
| Outcomes                                             |               |               |                     |              |                    |
| In-hospital falls                                    | 175 (2.9)     | 42 (1.8)      | 38 (2.0)            | 95 (5.5)     | <.001 <sup>i</sup> |
| In-hospital injurious falls                          | 32 (0.5)      | 10 (0.4)      | 7 (0.4)             | 15 (0.9)     | .07 <sup>i</sup>   |
| In-hospital mortality                                | 95 (1.6)      | 3 (0.1)       | 8 (0.4)             | 84 (4.8)     | <.001 <sup>i</sup> |
| Length of hospital stay                              | 9 (5–16)      | 8 (4–12)      | 8 (4–15)            | 12 (7–23)    | <.001 <sup>h</sup> |
| Discharge home                                       | 5382 (89.9)   | 2271 (95.5)   | 1718 (92.5)         | 1393 (80.3)  | <.001 <sup>i</sup> |

Notes: Data are presented as the mean ± standard deviation, median (interquartile range), or number (percentage). CCI = Charlson Comorbidity Index; FI-clinical = standard non-laboratory Frailty Index; FI-lab = Frailty Index based on laboratory tests; IQR = interquartile range; SD = standard deviation; STRATIFY = St. Thomas's Risk Assessment Tool in Falling Elderly Inpatients.

<sup>a</sup>Barthel Index score ranges from 0 to 100, with a higher score indicating higher function.

<sup>b</sup>The mean and SD are shown for reference.

<sup>c</sup>The CCI score ranges from 0 to 37, with a higher score indicating more comorbidities.

<sup>d</sup>The polypharmacy score ranges from 0 to 6, with a higher score indicating more medications in use.

<sup>e</sup>The STRATIFY score ranges from 0 to 5, with a higher score indicating a higher fall risk.

<sup>f</sup>The FI-lab and FI-clinical scores range from 0 to 1, with a higher score indicating worse frailty.

<sup>g</sup>Test for trends among the three subgroups.

<sup>h</sup>Jonckheere-Terpstra test.

<sup>i</sup>Cochran-Armitage test.

Supplementary Table 7

Results of subgroup analyses.

| Subgroup | n    | In-hospital fall,<br>n (%) |       | ROC-AUC  |                                           | p <sup>b</sup> |
|----------|------|----------------------------|-------|----------|-------------------------------------------|----------------|
|          |      |                            |       | STRATIFY | STRATIFY<br>including FI-lab <sup>s</sup> |                |
| Overall  | 5984 | 175                        | (2.9) | 0.674    | 0.718                                     | <0.001         |
| Age      |      |                            |       |          |                                           |                |
| < 75     | 3461 | 82                         | (2.4) | 0.672    | 0.721                                     | 0.014          |
| ≥ 75     | 2523 | 93                         | (3.7) | 0.647    | 0.698                                     | 0.002          |
| Sex      |      |                            |       |          |                                           |                |
| Male     | 3798 | 103                        | (2.7) | 0.657    | 0.705                                     | 0.006          |
| Female   | 2186 | 72                         | (3.3) | 0.704    | 0.741                                     | 0.025          |

Notes: FI-lab = Frailty Index-laboratory; ROC-AUC = area under the receiver-operating characteristic curve; STRATIFY = St.

Thomas's Risk Assessment Tool in Falling Elderly Inpatients.

<sup>a</sup>A total of 6 items: 5 STRATIFY items and 1 item on whether FI-lab is higher than 0.4.

<sup>b</sup>Comparison between STRATIFY and STRATIFY including FI-lab.



## Supplementary Table 8

Results of sensitivity analyses.

| Model <sup>a</sup>                                                      | ROC-AUC | 95% CI        | p      |
|-------------------------------------------------------------------------|---------|---------------|--------|
| With or without polypharmacy score <sup>b</sup>                         |         |               |        |
| STRATIFY                                                                | 0.674   | (0.632–0.716) | ref    |
| STRATIFY + polypharmacy score <sup>b</sup>                              | 0.675   | (0.633–0.716) | 0.64   |
| STRATIFY + FI-lab                                                       | 0.715   | (0.677–0.753) | 0.018  |
| STRATIFY + FI-lab + polypharmacy score <sup>b</sup>                     | 0.715   | (0.677–0.753) | 0.017  |
| STRATIFY + FI-clinical                                                  | 0.707   | (0.667–0.747) | 0.003  |
| STRATIFY + FI-clinical + polypharmacy score <sup>b</sup>                | 0.709   | (0.668–0.749) | 0.001  |
| Changing cut-off point of FI-lab                                        |         |               |        |
| FI-lab (binary variable: cut-off 0.4)                                   | 0.659   | (0.616–0.702) | ref    |
| FI-lab (binary variable: cut-off 0.345)                                 | 0.670   | (0.628–0.712) | 0.34   |
| STRATIFY including FI-lab <sup>c</sup> (binary variable: cut-off 0.4)   | 0.718   | (0.681–0.755) | ref    |
| STRATIFY including FI-lab <sup>c</sup> (binary variable: cut-off 0.345) | 0.725   | (0.690–0.759) | 0.40   |
| Changing fall prediction tool                                           |         |               |        |
| Fall risk assessment tool in the author's hospital                      | 0.667   | (0.626–0.709) | ref    |
| STRATIFY                                                                | 0.674   | (0.632–0.716) | 0.69   |
| Fall risk assessment tool including FI-lab <sup>d</sup>                 | 0.691   | (0.652–0.731) | <0.001 |

Notes: CI, confidence interval; FI-lab, Frailty Index-laboratory; ROC-AUC, area under the receiver-operating characteristic curve;

STRATIFY, St. Thomas's Risk Assessment Tool in Falling Elderly Inpatients.

<sup>a</sup>All models include age and sex as covariates.

<sup>b</sup>The polypharmacy score ranges from 0 to 6, with a higher score indicating more medications in use.

<sup>c</sup>A total of 6 items: 5 STRATIFY items and 1 item on whether FI-lab is higher than the cut-off.

<sup>d</sup>A total of 8 items: 7 items of fall risk assessment tool and 1 item on whether the FI-lab is higher than 0.4.

## Supplementary Figure 1

Frequency distributions for the STRATIFY (A), standard non-laboratory Frailty Index (FI-clinical) (B), and Frailty Index-laboratory (FI-lab) (C) (n=5984). STRATIFY = St. Thomas's Risk Assessment Tool in Falling Elderly Inpatients

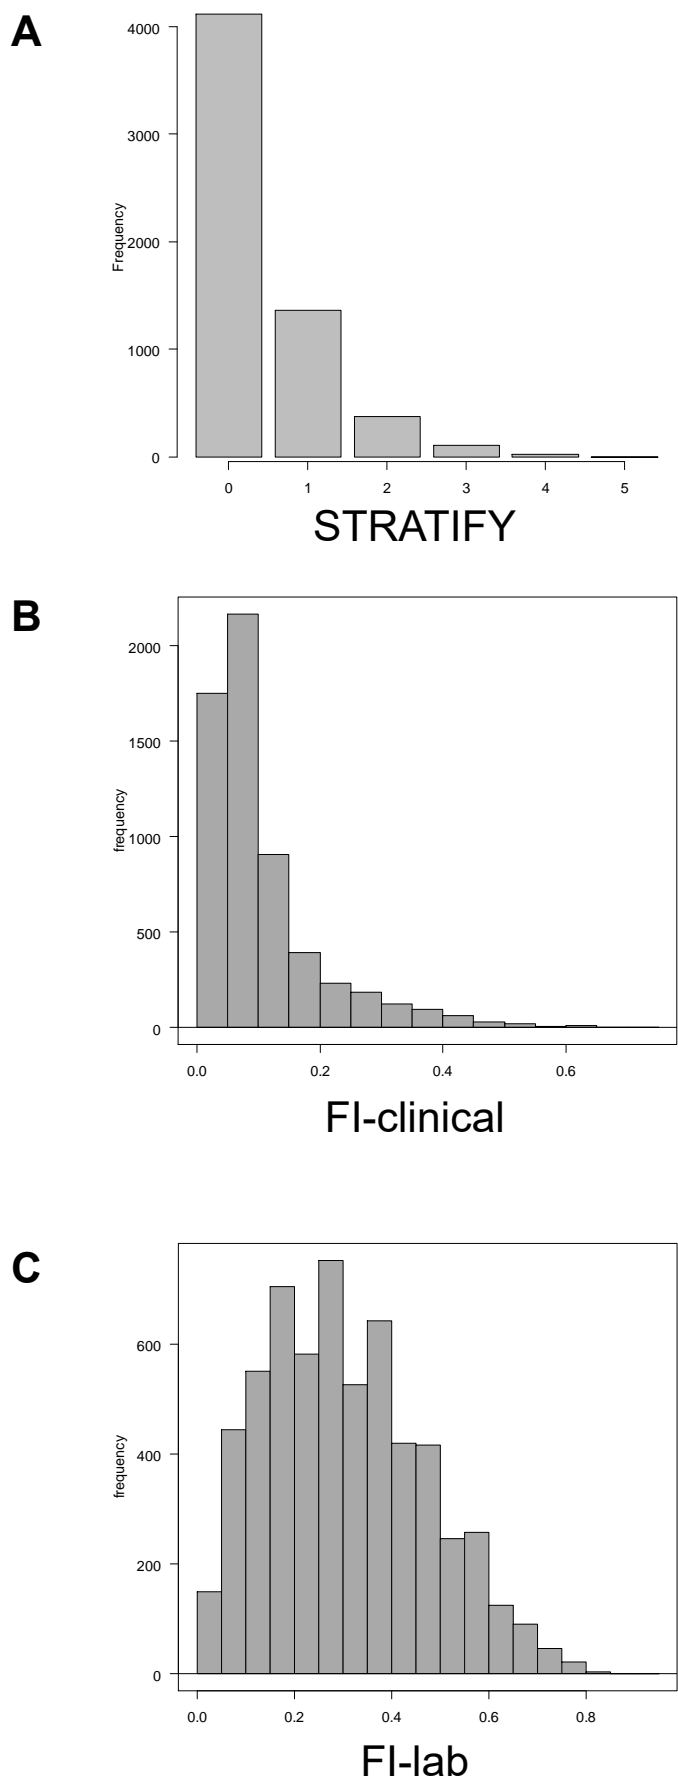

Supplement: Supplementary file 1 [file bd0b5644bf7c304219f66d88.pdf]
